# Supplementary material
Source: publisher figshare collection journal article supplement (https://acs.figshare.com/ndownloader/files/3919666)
Supplement: Supplementary file 1 [file 3919666]

## Supporting information for

# Pd Nanoparticles in Dendrimers Immobilized on Silica-Polyamine Composites as Catalysts for Selective Hydrogenation

Edward Karakhanov,<sup>a\*</sup> Anton Maximov,<sup>a,b</sup> Yulia Kardasheva,<sup>a</sup> Vera Semernina,<sup>a</sup> Anna Zolotukhina,<sup>a</sup> Andrey Ivanov,<sup>b</sup> Geoffrey Abbott,<sup>c</sup> Edward Rosenberg,<sup>c\*</sup> Vladimir Vinokurov,<sup>d</sup>

<sup>a</sup>Department of Petroleum Chemistry and Organic Catalysis, Moscow State University, 119991, Moscow, Russian Federation

<sup>b</sup>Institute of Petrochemical Synthesis RAS, 119991, Moscow, Russian Federation

<sup>c</sup>Department of Chemistry and Biochemistry, University of Montana, Missoula, MT 59812, USA.

<sup>d</sup>I. M. Gubkin Russian State University of Oil and Gas 119991 Moscow, Russian Federation

\* Tel.: +7 495 9395377. Fax: +7 495 9391951. E-mail: [kar@petrol.chem.msu.ru](mailto:kar@petrol.chem.msu.ru)

\* E-mail: [edward.rosenberg@mso.umt.edu](mailto:edward.rosenberg@mso.umt.edu)

### XPS spectrum of the BP-1 dendrimer hybrid

XPS spectrum of the modified support confirmed the presence of the  $(\text{CH}_2)_3\text{N}$  fragment, which are relevant for dendritic and polyallylamine areas of the support, and also the presence of Si-O and Si-C bonds<sup>1,2</sup>. As compared with the BP-1 starting material, the surface content of silicon and oxygen content was observed to drop to about one half of their original values (6.0% and 16.9%, respectively, versus 14.7% and 34.6%), while the atomic concentrations of carbon and nitrogen were doubled (61.1% and 16.0 % respectively versus 40.2% and 10.5%), indicating the dendrimers were successfully bound to the BP-1 surface.

### $^{13}\text{C}$ NMR

The  $^{13}\text{C}$  NMR spectrum of the dendrimer-modified support (Figure. S1) contained the following resonances: 13-20 ppm, assigned to the alkyl chains that are directly related to silicon; 28 ppm, assigned to the  $\beta\text{-CH}_2$  groups in the poly-alkylamine fragments; 41.6 ppm assigned to the  $\alpha\text{-CH}_2$  primary amino-groups of both the dendrimers and the polyallylamine phase of the initial support; 53.5 ppm assigned to the  $\alpha\text{-CH}_2$  group in the secondary and tertiary nitrogen atoms in poly-alkylamine fragments of the dendrimer<sup>3-5</sup>. The signals at 71 ppm refer to the bound methylene groups in the  $\text{NH-CH}_2\text{-OH}$ , formed in the interaction of formaldehyde with the support surface and dendrimers.

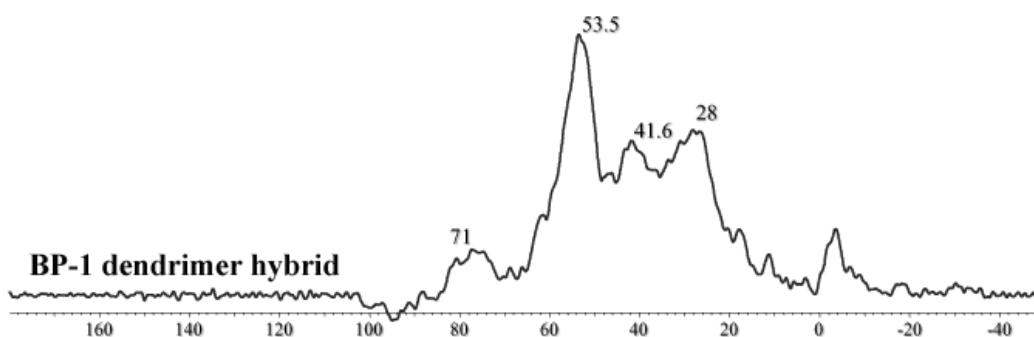

**Figure S1.  $^{13}\text{C}$  NMR spectrum of the BP-1 dendrimer hybrid.**

The  $^{13}\text{C}$  NMR spectra of **1** and **2** were recorded and confirmed the presence of dendrimers in both samples (Fig. S2). In the spectra of materials containing palladium nanoparticles the intensity of the signals corresponding to the carbon atoms located in  $\alpha$ -position of the primary amino-groups in the range of 30-45 ppm increased significantly. The broad signals at 51.1-56.6 ppm correspond to

the carbon atoms at tertiary amines. The growth of the nanoparticles results in a decrease in the dendritic fragment mobility and appears broadened and reduced the intensity of polypropylene imine signals.

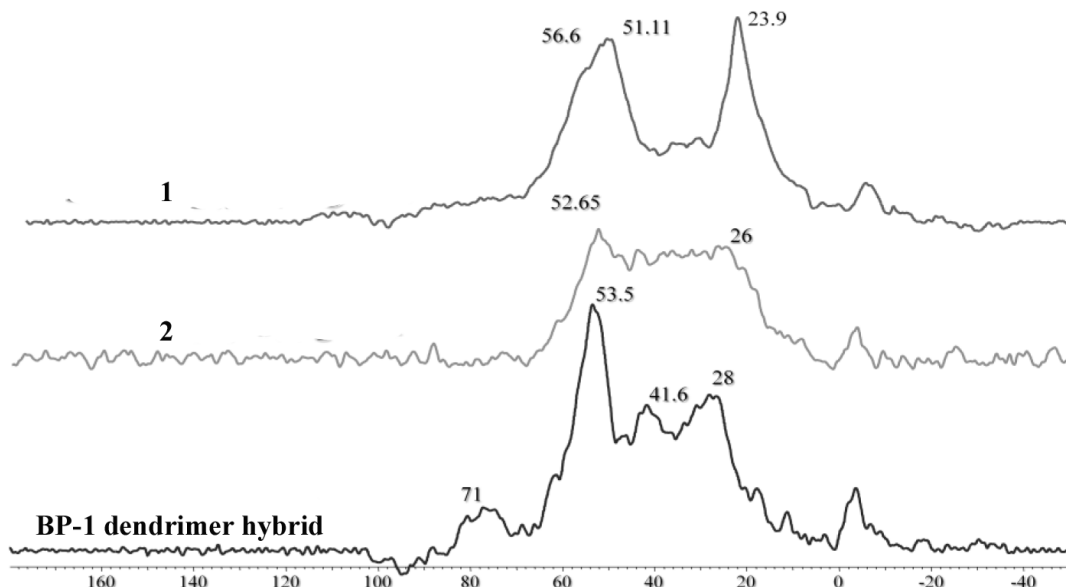

**Figure S2.**  $^{13}\text{C}$  NMR spectra of materials **1** (upper trace), **2** (middle trace) and **BP-1 dendrimer hybrid** (bottom trace).

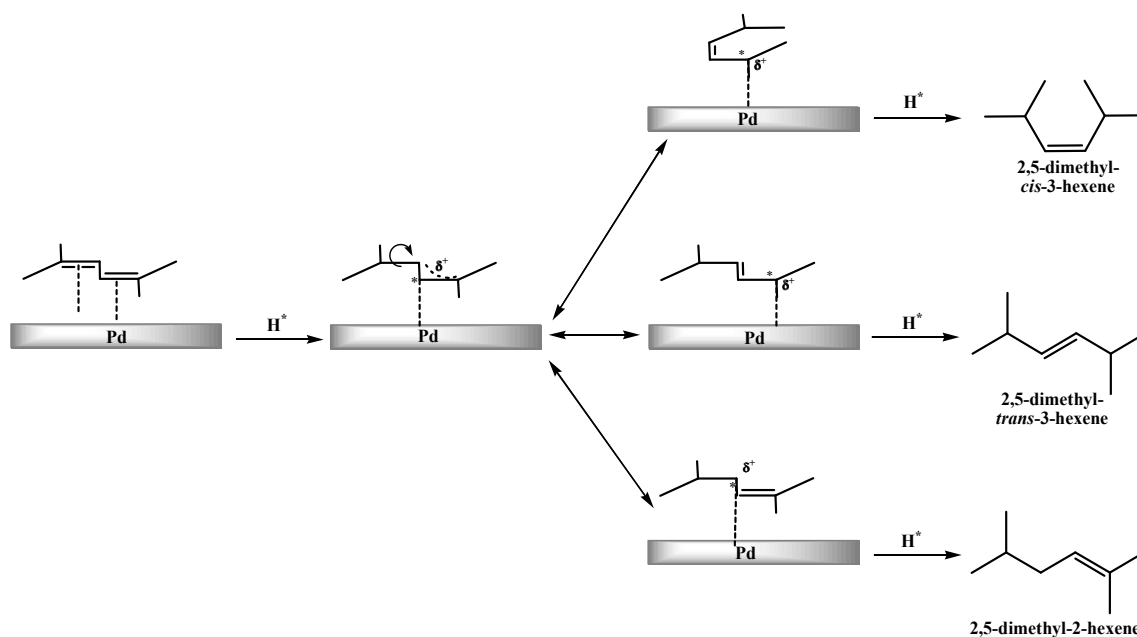

**Scheme S1.** A possible mechanism of 2,5-dimethyl-2,4-hexadiene hydrogenation on the dendrimer-containing Pd catalysts.

**Table S1. Hydrogenation of styrene in the presence of catalyst precursor 1<sup>a</sup>**

| Entry | P,<br>atm. | t, h | Substrate/Pd,<br>mol/mol | Conv.,% | SA, h <sup>-1</sup> |
|-------|------------|------|--------------------------|---------|---------------------|
| 1     | 10         | 0.25 | 6765                     | 74      | 20025               |
| 2     | 30         | 0.25 | 6765                     | 89      | 24085               |
| 3     | 10         | 0.25 | 13530                    | 62      | 33560               |
| 4     | 30         | 0.25 | 13530                    | 82      | 44385               |
| 5     | 30         | 0.25 | 21425                    | 77      | 65990               |
| 6     | 30         | 0.25 | 32140                    | 62      | 79700               |
| 7     | 30         | 0.25 | 64275                    | 43.5    | 111840              |

<sup>a</sup> Reaction conditions: 1 ml of substrate, 1.5 ml of the solvent, for 15 min., at 70 °C.

<sup>b</sup> SA = specific activity, mole product/mole catalyst/t

## REFERENCES:

- (1) NIST. XPS electronic database. <http://srdata.nist.gov/xps>.
- (2) Kim, D.H.; Jo, W.H. Studies on Polymer-Metal Interfaces. 2. Competitive Adsorption between Oxygen- and Nitrogen-Containing Functionality in Model Copolymers onto Metal Surfaces. *Macromolecules* **2000**, *33*, 3050-3058.
- (3) Krishnan, G. R.; Sreekumar, K. Synthesis and Characterization of Polystyrene Supported Catalytically Active Poly(Amidoamine) Dendrimer-Palladium Nanoparticle Conjugates. *Soft Mater.* **2010**, *8*, 114-129.
- (4) González, B.; Colilla, M.; López de Laorden, C.; Vallet-Regí, M. A Novel Synthetic Strategy for Covalently Bonding Dendrimers to Ordered Mesoporous Silica: Potential Drug Delivery Applications. *J. Mater. Chem.*, **2009**, *19*, 9012–9024.
- (5) Papp, A.; Miklós, K.; Forgo, P.; Molnár, Á. Heck Coupling by Pd Deposited onto Organic-Inorganic Hybrid Supports. *J. Mol. Catal. A: Chem.* **2005**, *229*, 107–116.
